# Supplementary material for: Nitrile-containing copper(ii) porphyrin coordination complexes for efficient anticancer activity and mechanism research
Source: Royal Society of Chemistry journal article supplement (doi:10.1039/d1nj00326g), 2021-01-01
Supplement: d1nj00326g1.pdf [file d1nj00326g1.pdf]

## Electronic Supplementary Information

### **Nitrile-containing copper(II) porphyrin coordination complexes for efficient anticancer activity and mechanism research**

**Qian Zhang, Jin-li Liu, Xiao-xia Feng\* Jia-cheng Liu \***

*Key Laboratory of Eco-functional Polymer Materials of the Ministry of Education, Key Laboratory of Eco-environmental Polymer Materials of Gansu Province, Key Laboratory of Bioelectrochemistry & Environmental Analysis of Gansu Province, College of Chemistry and Chemical Engineering, Northwest Normal University, Lanzhou 730070, People's Republic of China*

*\* Corresponding author.*

*E-mail addresses: jcliu8@nwnu.edu.cn (J. C. Liu).*

## **1. Experimental**

### **1. 1. Materials**

Penicillin/Streptomycin, MTT [3-(4, 5-dimethylthiazol-2-yl)-2, 5-diphenyltetrazolium bromide], Calf tymus DNA (ct-DNA), JC-1 mitochondrial membrane potential assay kit and RNaseA were purchased from Solarbio, DMEM-F12 medium, RPMI 1640 medium, DMEM (high glucose) medium were purchased from HyClone, Fetal bovine serum was purchased from Biological Industries, Calcein-AM/PI was purchased from Yeasen. All other chemicals were commercially analytical grade and were used without further purification. Human lung carcinoma cell lines A549 and H-1975, human liver carcinoma cell lines HepG2, human breast cancer cells T47D and breast cells Hs 578Bst were purchased from Chinese Academy of Sciences Shanghai Institute of Cell Bank.

### **1. 2. Instrumentation**

Cell cycle analysis and assessment of intracellular mitochondrial membrane potential (MMP) were taken on a FACScan flow cytometer (Becton Dickinson, USA). Cell viability assay was performed with a microplate reader (model MK3, Thermo Fisher). Apoptosis detection by Calcein-AM/PI fluorescent staining and assessment of intracellular mitochondrial membrane potential (MMP) by JC-1 fluorescent staining were taken on fluorescent microscope (Olympus IX71). The Luminescence spectrum was measured by LS-55 (PEUSA Inc) fluorescence spectrophotometer at room temperature. UV-Vis spectra were taken on a UV-2550 spectrometer.

### **1. 3. Synthesis of sample**

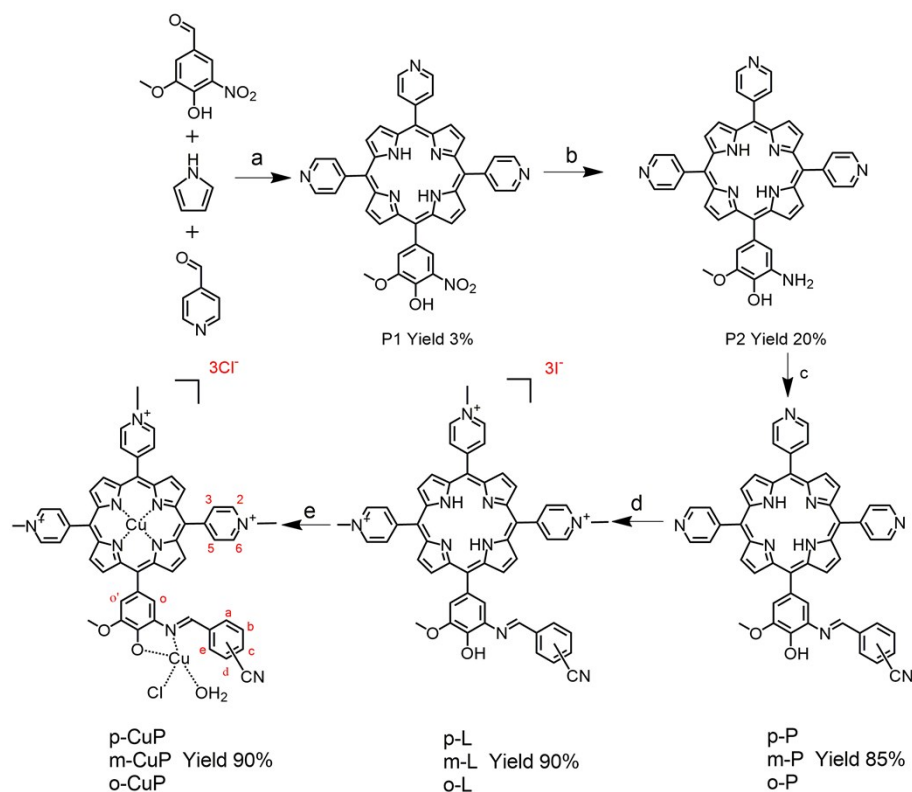

**Scheme S1.** The synthetic routes of Cu(II) complexes **p-CuP**, **m-CuP** and **o-CuP**. a. Propionic acid and propionic anhydride, 140 °C reflux 1.5 h; b. SnCl<sub>2</sub>·2H<sub>2</sub>O, HCl (6 M), Ar, r. t, 15 h; c. p-Cyanobenzaldehyde (or m-Cyanobenzaldehyde or o-Cyanobenzaldehyde), toluene, acetic acid, 75 °C, 72 h; d. CH<sub>3</sub>I, Ar, DMF, 50 °C, 3 h; e. CuCl<sub>2</sub>·2H<sub>2</sub>O, MeOH, 60 °C, 6 h;

### 1. 3. 1. Synthesis of P1 and P2

**P1** and **P2** were prepared according to the method for our previous work <sup>1</sup>.

### 1. 3. 2. Synthesis of p-P, m-P and o-P

The precursor porphyrin **P2** (100 mg, 0.15 mmol) and p-Cyanobenzaldehyde or m-Cyanobenzaldehyde or o-Cyanobenzaldehyde (20 mg, 0.15 mmol) were dissolved in toluene, a few drops of acetic acid were added. The solution was stirred 72h at 75 °C and washed with diethyl ether, then get the product **p-P** or **m-P** or **o-P** and 85% isolated yield.

**p-P**: <sup>1</sup>H NMR (CDCl<sub>3</sub>, 600 MHz): -2.88 (s, 2H, NH-H), 4.02 (s, 3H, -OCH<sub>3</sub>-H), 7.74, 7.76 (br, 2H, o, o'-ph-H), 7.80 (s, 1H, b-ph-H), 7.82, 7.83 (br, 1H, d-ph-H), 7.91 (s, 1H, CH=N-H), 8.03, 8.04 (d, J=6 Hz, 2H, a, e-ph-H), 8.16 (s, 6H, 3, 5 Py-H), 8.80-8.88 (m, 6H, 2, 6 Py-H), 9.04-9.06 (m, 8H, β-pyrrole-H). HRMS (ESI, positive ion mode, m/z): [M+H]<sup>+</sup> calcd for [C<sub>50</sub>H<sub>33</sub>N<sub>9</sub>O<sub>2</sub>+H]<sup>+</sup>, 792.28300; found, 792.28308.

**m-P**: <sup>1</sup>H NMR (CDCl<sub>3</sub>, 600 MHz): -2.86 (s, 2H, NH-H), 4.02 (s, 3H, -OCH<sub>3</sub>-H), 7.53 (s, 1H, o-ph-H), 7.56-7.59 (m, 1H, o'-ph-H), 7.67 (s, 1H, a-ph-H), 7.74, 7.75 (br, 1H, c-ph-H), 7.78 (s, 1H, d-ph-H), 7.83 (s, 1H, e-ph-H), 8.03 (s, 1H, CH=N-H), 8.15 (s, 6H, 3, 5 Py-H), 8.75-8.85 (m, 6H, 2, 6 Py-H), 8.97-9.05 (m, 8H, β-pyrrole-H). HRMS (ESI, positive ion mode, m/z): [M+H]<sup>+</sup> calcd for [C<sub>50</sub>H<sub>33</sub>N<sub>9</sub>O<sub>2</sub>+H]<sup>+</sup>, 792.28300; found, 792.28271.

**o-P**: <sup>1</sup>H NMR (CDCl<sub>3</sub>, 600 MHz): -2.85 (s, 2H, NH-H), 4.02 (s, 3H, -OCH<sub>3</sub>-H), 7.83-7.85 (m, 2H, o, o'-ph-H), 8.02 (m, 2H, b, c-ph-H), 8.04-8.06 (m, 2H, d, e-ph-H), 8.08, 8.10 (d, J=12 Hz, 1H, CH=N-H), 8.17-8.18 (m, 6H, 3, 5 Py-H), 8.80-8.86 (m, 6H, 2, 6 Py-H), 9.06-9.09 (m, 8H, β-pyrrole-H). HRMS (ESI, positive ion mode, m/z): [M+H]<sup>+</sup> calcd for [C<sub>50</sub>H<sub>33</sub>N<sub>9</sub>O<sub>2</sub>+H]<sup>+</sup>, 792.28300; found, 792.28253.

### 1. 3. 3. Synthesis of p-L, m-L and o-L

In 5 ml DMF was added 100 mg (0.13mmol) **p-P** or **m-P** or **o-P** an excess of iodomethane under argon in the dark, after the solution was stirred at 75 °C for 72h and was washed with CH<sub>2</sub>Cl<sub>2</sub>, then product **p-L** or **m-L** or **o-L** were filtered and obtain dry cake with 90% yield.

**p-L**: <sup>1</sup>H NMR (DMSO-d<sub>6</sub>, 600 MHz): -3.05 (s, 2H, NH-H), 3.95 (s, 3H, -OCH<sub>3</sub>-H), 4.70, 4.71 (d, J=6 Hz, 9H, -NCH<sub>3</sub>-H), 7.63 (s, 1H, o-ph-H), 7.92 (s, 1H, o'-ph-H), 8.07 (s, 1H, b-ph-H), 8.11 (s, 1H, d-ph-H), 8.38 (s, 2H, a, e-ph-H), 8.73, 8.74 (d, J=6 Hz, 1H, CH=N-H), 8.97, 8.98 (d, J=6 Hz, 8H, β-pyrrole-H), 9.14, 9.16 (d, J=12 Hz, 6H, 3, 5 Py-H) 9.46 (s, 6H, 2, 6 Py-H). HRMS (ESI, positive ion mode, m/z): [M]<sup>3+</sup> calcd for [C<sub>53</sub>H<sub>42</sub>N<sub>9</sub>O<sub>2</sub>]<sup>3+</sup>, 278.7815; found, 278.7805.

**m-L**: <sup>1</sup>H NMR (DMSO-d<sub>6</sub>, 600 MHz): -3.03 (s, 2H, NH-H), 3.90 (s, 3H, -OCH<sub>3</sub>-H), 4.73-4.74 (t, J<sub>1</sub>=3.6 Hz, J<sub>2</sub>=4.2 Hz, 9H, -NCH<sub>3</sub>-H), 7.65 (s, 1H, o-ph-H), 7.93-7.96 (m, 1H, o'-ph-H), 8.09 (s, 1H, a-ph-H), 8.13 (s, 1H, c-ph-H), 8.40-8.45 (m, 1H, CH=N-H), 8.75, 8.76 (d, J=6 Hz, 2H, d, e-ph-H), 8.99-9.08 (m, 8H, β-pyrrole-H), 9.16-9.21 (m, 6H, 3, 5 Py-H), 9.48 (s, 6H, 2, 6 Py-H). HRMS (ESI, positive ion mode, m/z): [M]<sup>3+</sup> calcd for [C<sub>53</sub>H<sub>42</sub>N<sub>9</sub>O<sub>2</sub>]<sup>3+</sup>, 278.7815; found, 278.7844.

**o-L**: <sup>1</sup>H NMR (DMSO-d<sub>6</sub>, 600 MHz): -3.02 (s, 2H, NH-H), 3.91 (s, 3H, -OCH<sub>3</sub>-H), 4.74 (d, J=3.6 Hz, 9H, -NCH<sub>3</sub>-H), 7.94, 7.95, 7.96 (t, J<sub>1</sub>=6 Hz, J<sub>2</sub>=6 Hz, 1H,

CH=N-H), 8.10 (s, 1H, o-ph-H), 8.13 (m, 1H, o'-ph-H), 8.41-8.46 (m, 2H, b, c-ph-H), 8.76, 8.77 (d, J=6 Hz, 2H, d, e-ph-H), 8.99-9.09 (m, 8H,  $\beta$ -pyrrole-H), 9.19, 9.26 (br, 6H, 3, 5 Py-H), 9.49 (br, 6H, 2, 6 Py-H). HRMS (ESI, positive ion mode, m/z):  $[M]^{3+}$  calcd for  $[C_{53}H_{42}N_9O_2]^{3+}$ , 278.7815; found, 278.7832.

### 1. 3. 4. Synthesis of p-CuP or m-CuP or o-CuP

The ligand **p-L** or **m-L** or **o-L** (100 mg, 0.12 mmol) and  $CuCl_2 \cdot 2H_2O$  (5 equivalents) were added to 60 mL of MeOH at 60 °C for 6 h. The solvent was evaporated, the crude products were repetitive washed by ethyl acetate to give the complexes **p-CuP** or **m-CuP** or **o-CuP** as a dark purple solid. Yield: 90%.

**p-CuP**: Anal. Calcd for  $C_{53}H_{41}Cl_4Cu_2N_9O_3$  ( $M_w$ : 1120.8551): C, 56.79; H, 3.69; N, 11.25; Found: C, 56.43; H, 3.92; N, 10.93. HRMS (ESI, positive ion mode, m/z): Calcd for  $[M-3Cl]^{3+}$ , 337.3865; Found, 337.3852.

**m-CuP**: Anal. Calcd for  $C_{53}H_{41}Cl_4Cu_2N_9O_3$  ( $M_w$ : 1120.8551): C, 56.79; H, 3.69; N, 11.25; Found: C, 57.02; H, 3.46; N, 11.62. HRMS (ESI, positive ion mode, m/z): Calcd for  $[M-3Cl]^{3+}$ , 337.3865; Found, 337.3896.

**o-CuP**: Anal. Calcd for  $C_{53}H_{41}Cl_4Cu_2N_9O_3$  ( $M_w$ : 1120.8551): C, 56.79; H, 3.69; N, 11.25; Found: C, 56.35; H, 4.03; N, 10.66. HRMS (ESI, positive ion mode, m/z): Calcd for  $[M-3Cl]^{3+}$ , 337.3865; Found, 337.3858.

The FTIR spectra of the complexes (**p-CuP**, **m-CuP** and **o-CuP**) and free ligands (**p-L**, **m-L** and **o-L**) are described in **Figure S4**, **S5** and **S6**. For free ligands, the in-plane bending vibration of the N-H (pyrrole rings) at 975, 974 and 974  $cm^{-1}$  were observed. However, these bands disappeared in the spectra of **p-CuP**, **m-CuP** and **o-CuP** because of deprotonation and metalation of the pyrrole rings, besides, for complexes, the band at 433, 430 and 447 were attributed to characteristic peak of Cu-N coordination bonds and put it down to generated the metal complexes. Ligands show strong bands at 1633, 1632 and 1633  $cm^{-1}$  due to  $\nu_{(C=N)}$ , but the complexes at 1624, 1623 and 1622  $cm^{-1}$ , shifted to lower frequency has been observed. Together, these characteristic bands suggest that nitrogen atoms of the pyrrole rings and azomethine coordinate with metal ion <sup>2-4</sup>.

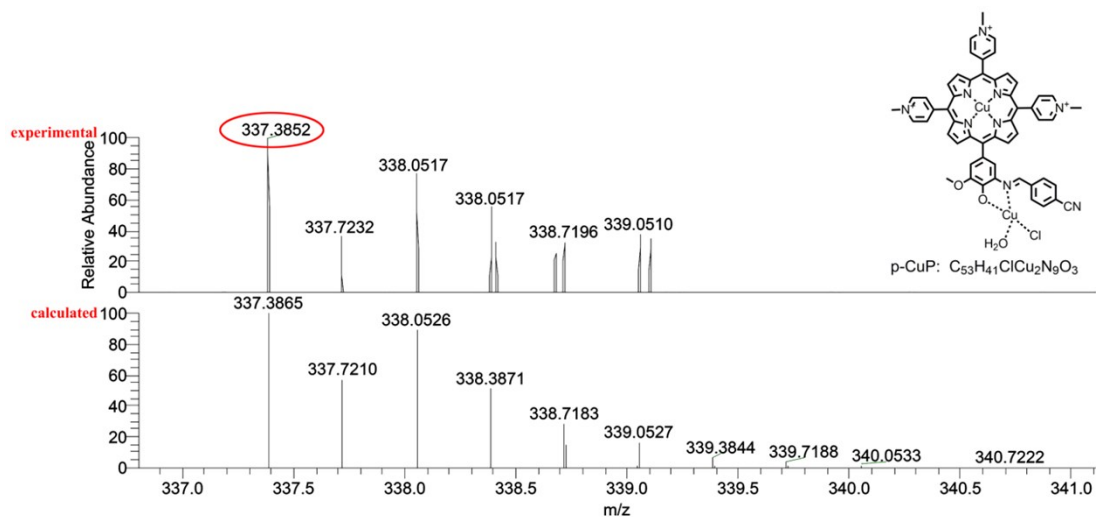

**Figure S1.** High resolution mass spectrum of p-CuP in CH<sub>3</sub>OH: experimental and calculated spectra of the main peak.

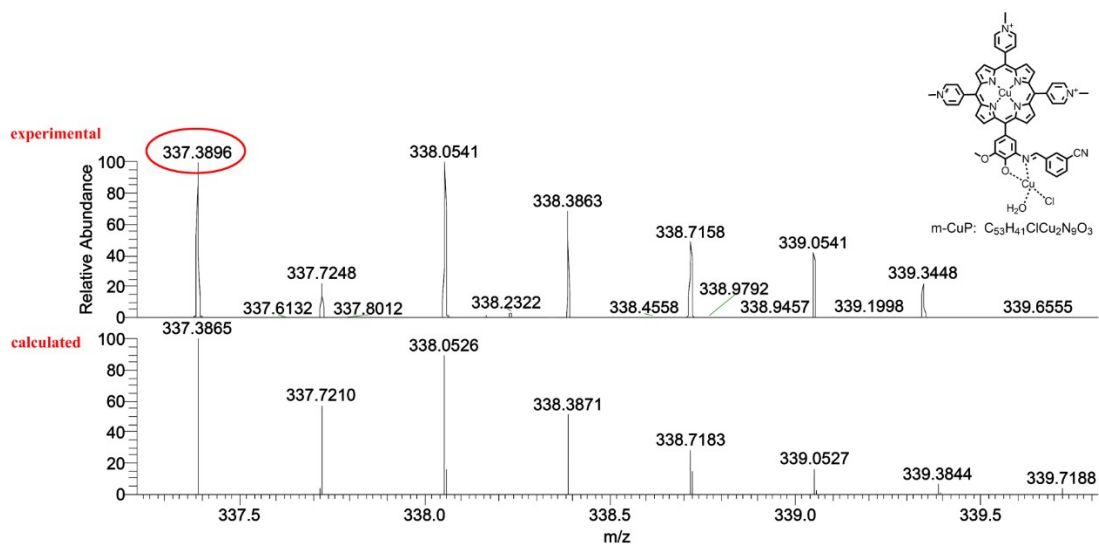

**Figure S2.** High resolution mass spectrum of m-CuP in CH<sub>3</sub>OH: experimental and calculated spectra of the main peak.

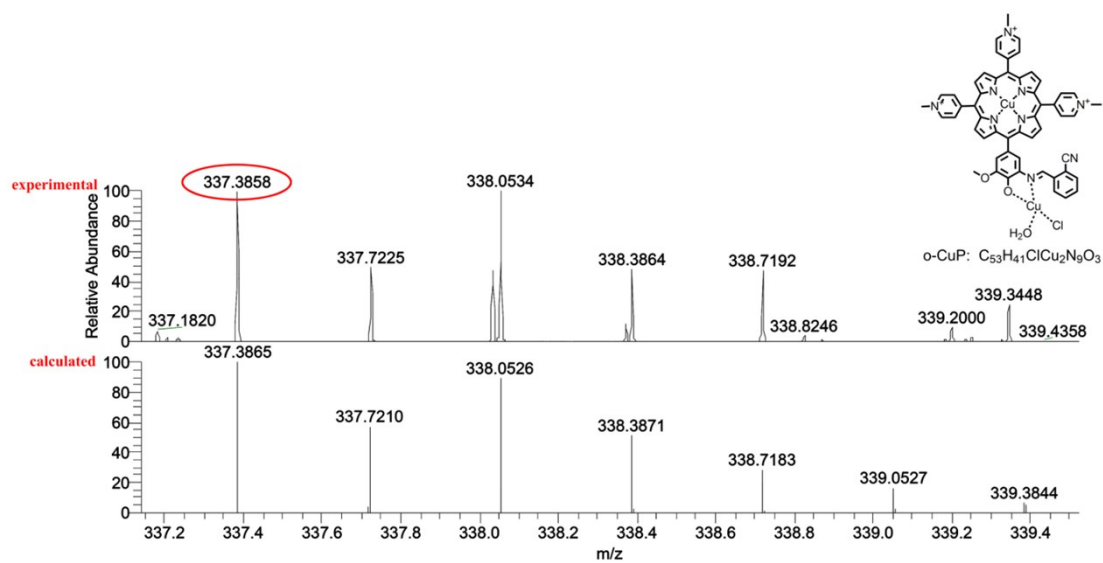

**Figure S3.** High resolution mass spectrum of *o*-CuP in CH<sub>3</sub>OH: experimental and calculated spectra of the main peak.

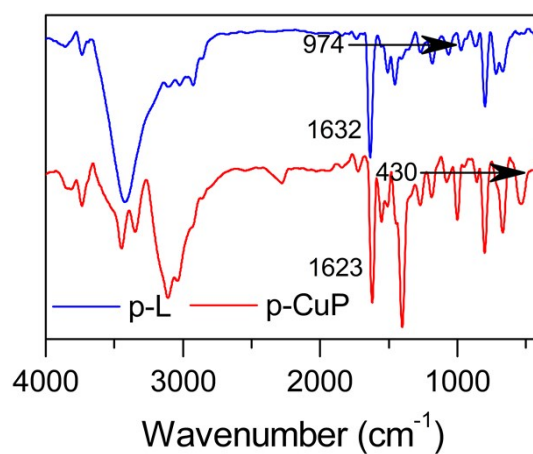

**Figure S4.** IR spectra of *p*-L and *p*-CuP.

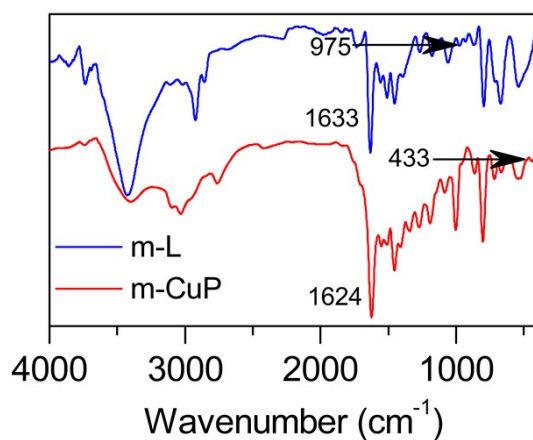

**Figure S5.** IR spectra of *m*-L and *m*-CuP.

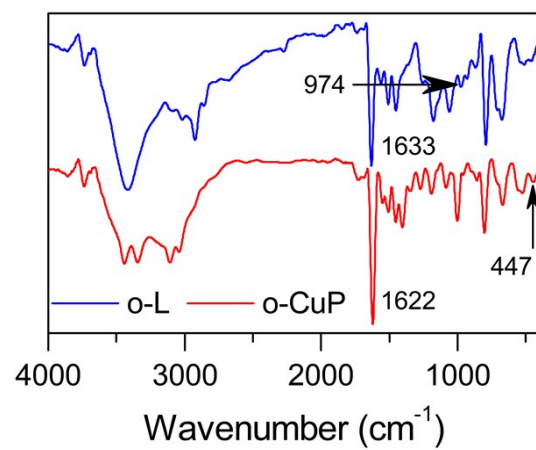

**Figure S6.** IR spectra of **o-L** and **o-CuP**.

## **2. Results and discussion**



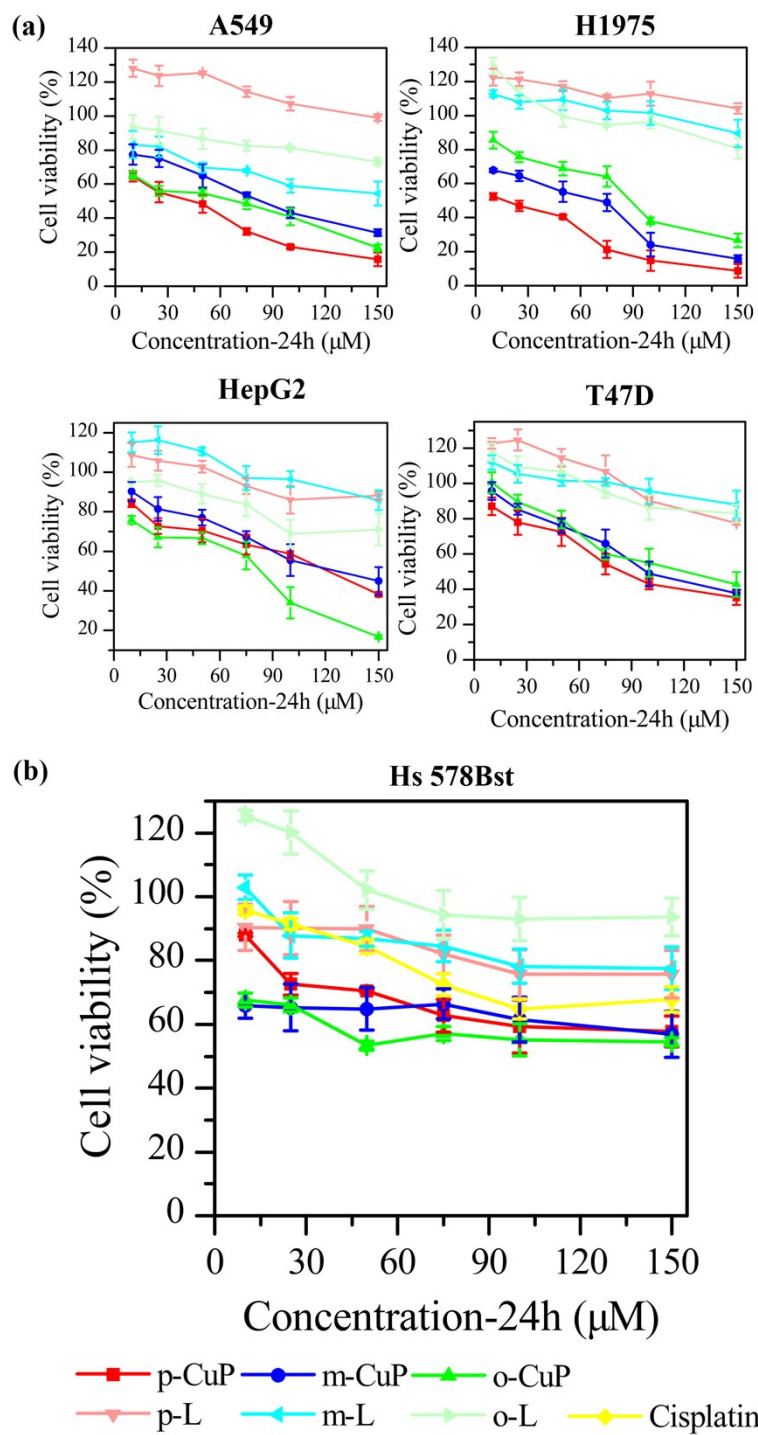

**Figure S7.** Ligands, complexes and cisplatin are being used in the treatment of **(a)** human cancer cell lines (A549, H1975, HepG2 and T47D), **(b)** normal cells (Hs 578Bst) for 24h.

**Table S1.** IC<sub>50</sub> values (μM) of ligands, complexes and cisplatin with different cell lines for 24 h.

| Compound  | A549   | H1975  | HepG2   | T47D    | Hs 578Bst |
|-----------|--------|--------|---------|---------|-----------|
| p-CuP     | 28.309 | 16.464 | 126.656 | 88.45   | >150      |
| m-CuP     | 77.108 | 40.618 | 139.45  | 106.774 | >150      |
| o-CuP     | 42.545 | 80.112 | 58.91   | 115.566 | >150      |
| p-L       | >150   | >150   | >150    | >150    | >150      |
| m-L       | >150   | >150   | >150    | >150    | >150      |
| o-L       | >150   | >150   | >150    | >150    | >150      |
| Cisplatin | -      | 12.651 | -       | -       | 178.041   |

In Cisplatin row, “-” represents not determined

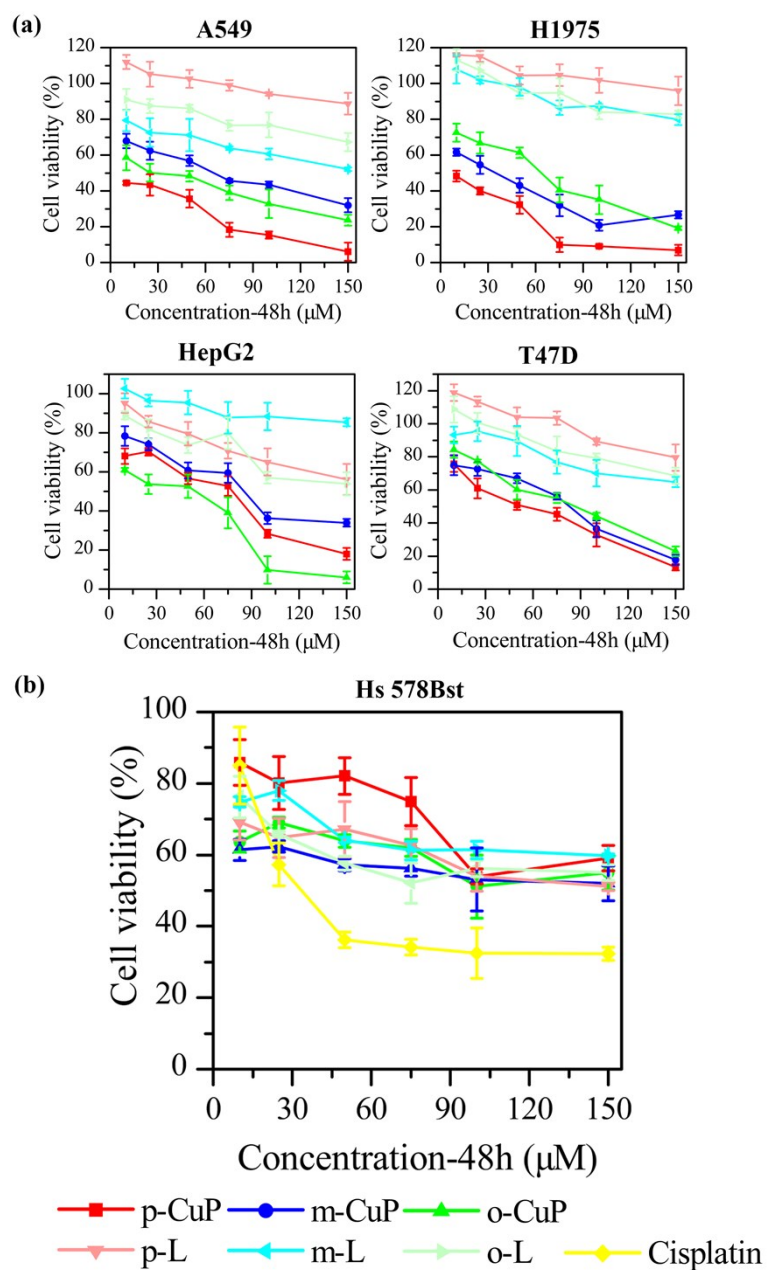

**Figure S8.** Ligands, complexes and cisplatin are being used in the treatment of (a) human cancer cell lines (A549, H1975, HepG2 and T47D), (b) normal cells (Hs 578Bst) for 48h.

**Table S2.** IC<sub>50</sub> values (μM) of ligands, complexes and cisplatin with different cell lines for 48 h.

| Compound  | A549   | H1975  | HepG2  | T47D   | Hs 578Bst |
|-----------|--------|--------|--------|--------|-----------|
| p-CuP     | 8.3444 | 8.276  | 47.558 | 42.426 | >150      |
| m-CuP     | 55.165 | 25.148 | 75.395 | 62.441 | >150      |
| o-CuP     | 25.507 | 48.234 | 26.046 | 75.581 | >150      |
| p-L       | >150   | >150   | >150   | >150   | >150      |
| m-L       | >150   | >150   | >150   | >150   | >150      |
| o-L       | >150   | >150   | >150   | >150   | >150      |
| Cisplatin | -      | 4.085  | -      | -      | 55.638    |

In Cisplatin row, “-” represents not determined

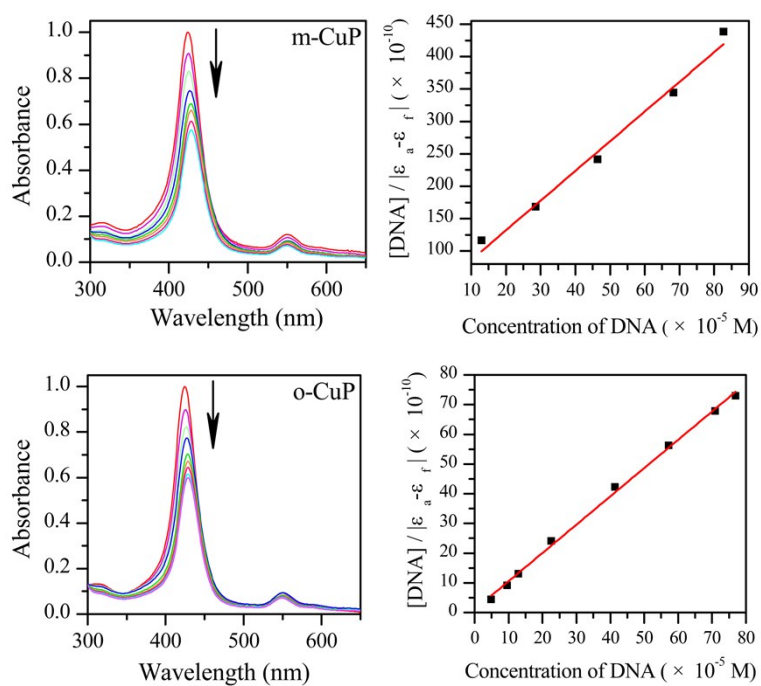

**Figure S9.** Absorption spectra of complex **m-CuP** and **o-CuP** in the presence ct-DNA at different concentrations (a) and (c). Calculation of binding constant (b) and (d).

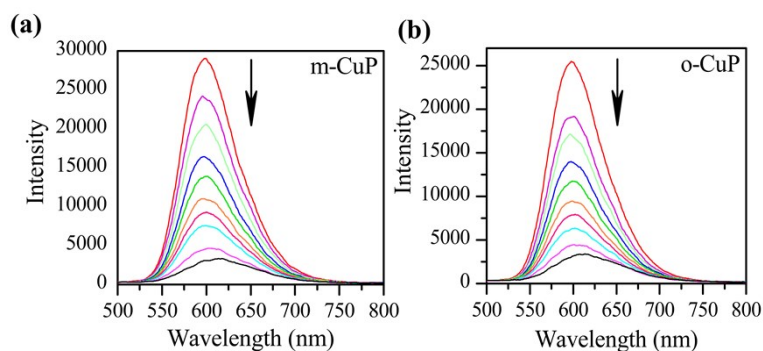

**Figure S10.** Fluorescence quenching of complex **m-CuP** and **o-CuP** bound to DNA-EtBr.

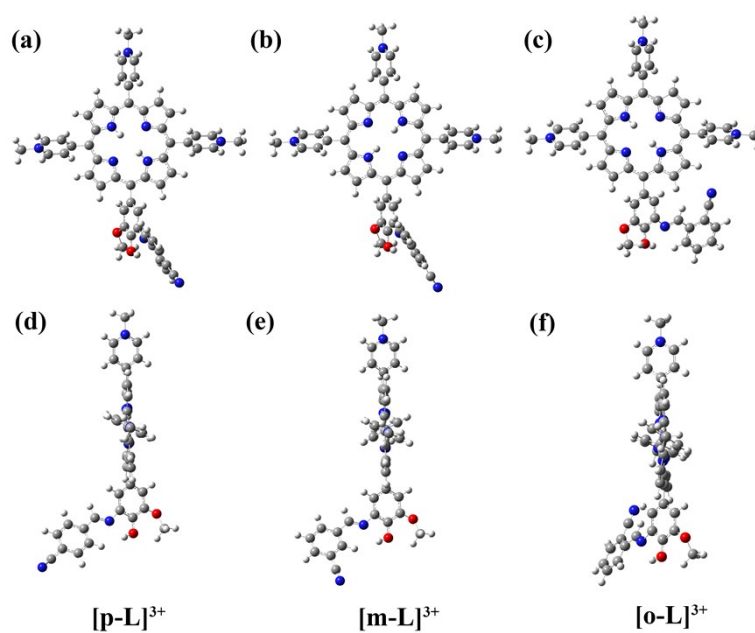

**Figure S11.** Optimized structures of cationic porphyrin ligands, top view (a) [p-L]<sup>3+</sup>, (b) [m-L]<sup>3+</sup>, (c) [o-L]<sup>3+</sup>; side view (d) [p-L]<sup>3+</sup>, (e) [m-L]<sup>3+</sup>, (f) [o-L]<sup>3+</sup>.

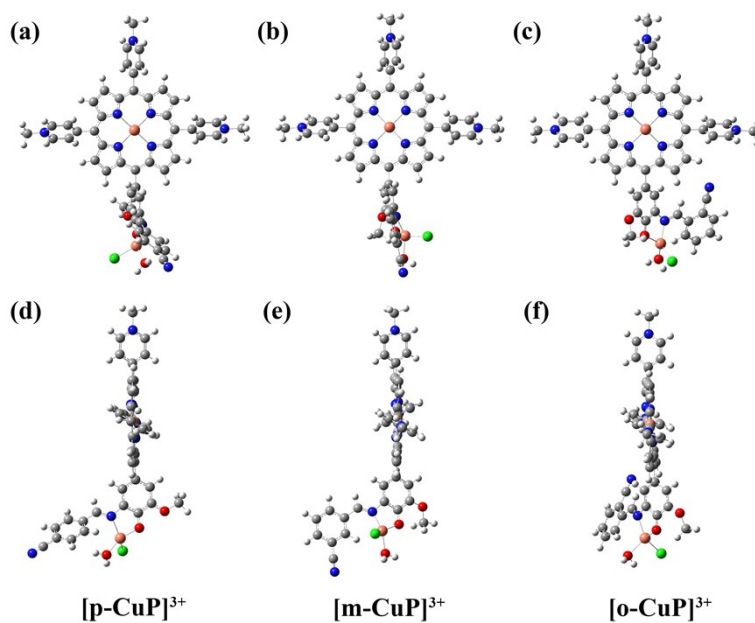

**Figure S12.** Optimized structures of cationic porphyrin complexes, top view (a) [p-CuP]<sup>3+</sup>, (b) [m-CuP]<sup>3+</sup>, (c) [o-CuP]<sup>3+</sup>; side view (d) [p-CuP]<sup>3+</sup>, (e) [m-CuP]<sup>3+</sup>, (f) [o-CuP]<sup>3+</sup>.

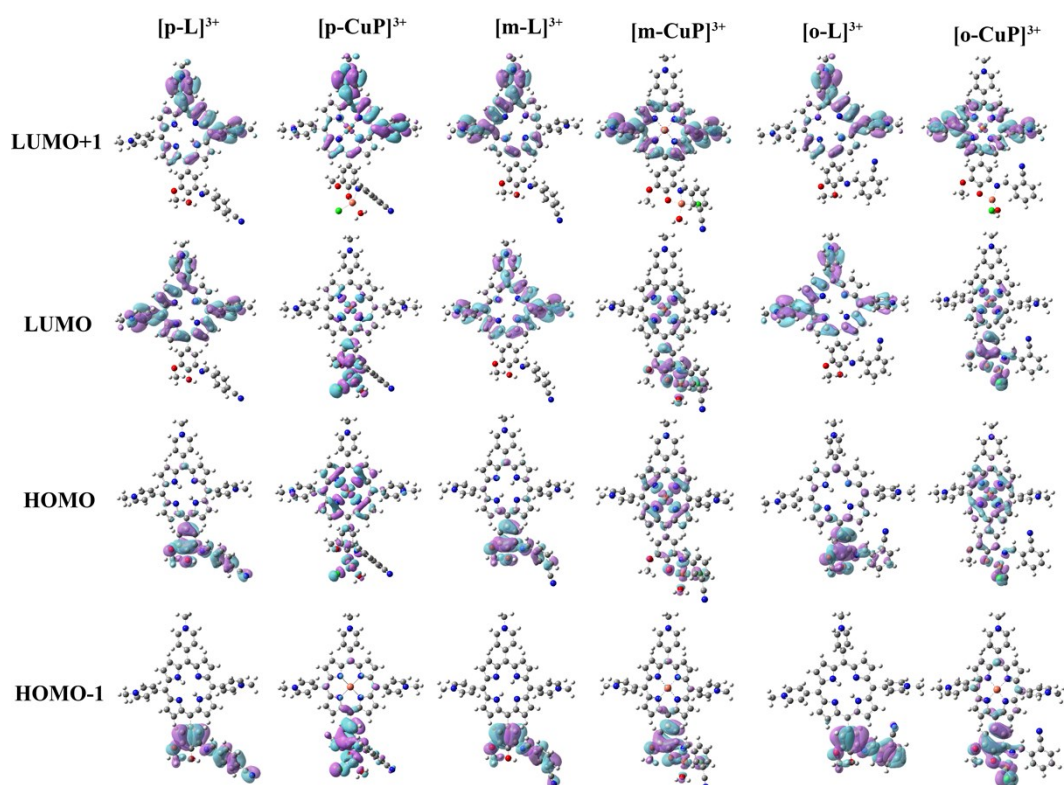

**Figure S13.** Frontier molecular orbitals for the HOMO-1, HOMO, LUMO, and LUMO+1, of the cationic porphyrin ligands and complexes.

**Table S3.** The calculated other parameters derived from HOMO, LUMO energy values.

| Compound              | $E_{\text{HOMO}}$<br>(eV) | $E_{\text{LUMO}}$<br>(eV) | $\Delta E^a$<br>(eV) | $M^b$    | $\chi^c$ | $\eta^d$ | $S^e$    | $\omega^f$ |
|-----------------------|---------------------------|---------------------------|----------------------|----------|----------|----------|----------|------------|
| [p-CuP] <sup>3+</sup> | -9.61324                  | -9.27882                  | 0.334428             | -9.44603 | 9.446029 | 0.167214 | 2.990179 | 266.8061   |
| [m-CuP] <sup>3+</sup> | -9.61079                  | -9.21324                  | 0.397559             | -9.41202 | 9.412015 | 0.198779 | 2.515353 | 222.8251   |
| [o-CuP] <sup>3+</sup> | -9.66685                  | -9.25269                  | 0.414158             | -9.45977 | 9.459771 | 0.207079 | 2.41454  | 216.0706   |

$I = -E_{\text{HOMO}}$ ,  $A = -E_{\text{LUMO}}$ ;

$^a\Delta E = I - A$ ;  $^b\mu = -(I + A) / 2$ ;  $^c\chi = (I + A) / 2$ ;  $^d\eta = (I - A) / 2$ ;  $^eS = 1 / 2\eta$ ;  $^f\omega = \mu^2 / 2\eta$ .



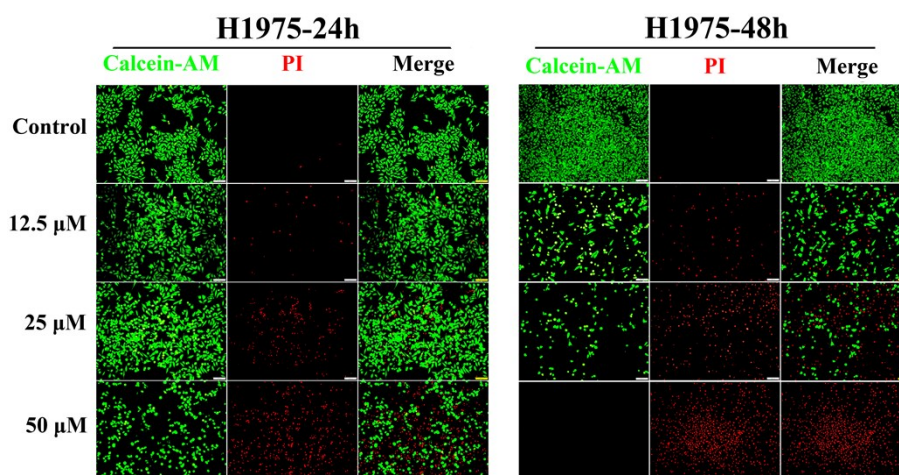

**Figure S14.** Fluorescent microscopic imaging of H1975 cells treated with **p-CuP** for 24 and 48h, by staining with Calcein-AM/propidium iodide (original magnification, 10×).

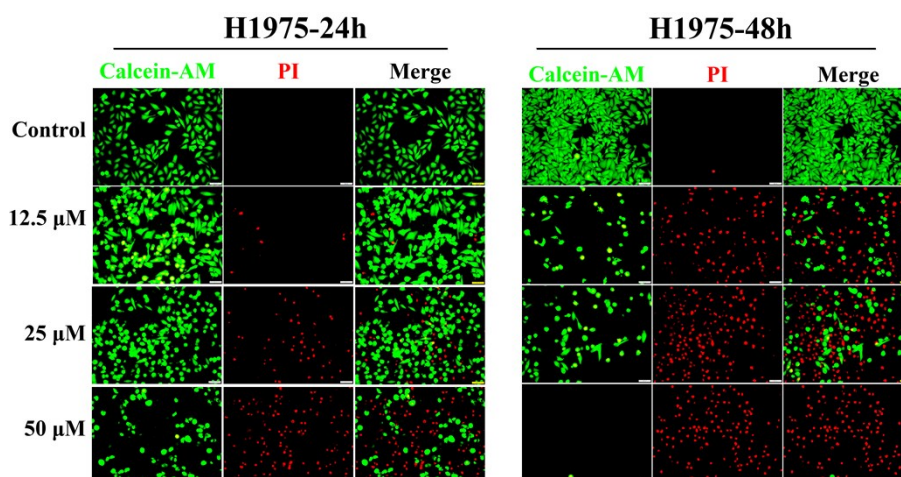

**Figure S15.** Fluorescent microscopic imaging of H1975 cells treated with **p-CuP** for 24 and 48h, by staining with Calcein-AM/propidium iodide (original magnification, 20×).

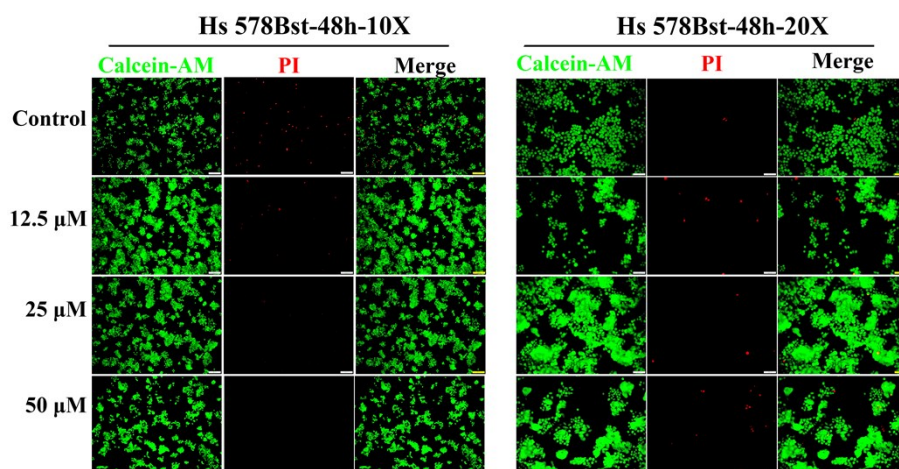

**Figure S16.** Fluorescent microscopic imaging of Hs 578Bst cells treated with **p-CuP** for 48h, by staining with Calcein-AM/propidium iodide (original magnification, 10 and 20×).

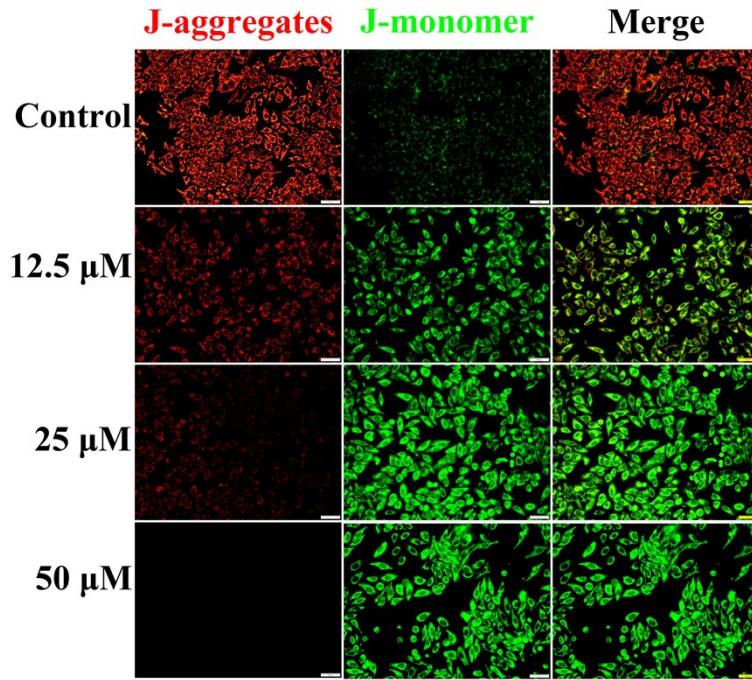

**Figure S17.** The mitochondrial membrane potentials (MMPs) using JC-1 after staining H1975 cells with **p-CuP** observed by fluorescence microscope (original magnification, 10 $\times$ )

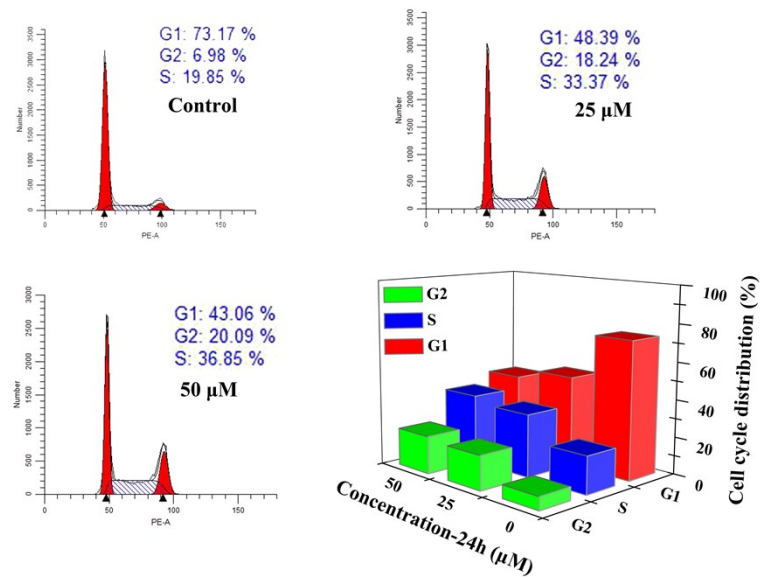

**Figure S18.** Cell cycle arrest of complex **p-CuP** against H1975 cells after 24h.



## References

1. Q. Zhang, Q. Zhang, Z.-z. Li, H. Liu and J.-c. Liu, *Dyes Pigment.*, 2020, **173**, 107923.
2. R. Boscencu, *Molecules*, 2011, **16**, 5604-5617.
3. W. Chen, M. E. El-Khouly and S. Fukuzumi, *Inorg. Chem.*, 2011, **50**, 671-678.
4. Y.-F. Huo, L.-N. Zhu, K.-K. Liu, L.-N. Zhang, R. Zhang and D.-M. Kong, *Inorg. Chem.*, 2017, **56**, 6330-6342.
